# Supplementary material for: Type I IFN blockade uncouples immunotherapy-induced antitumor immunity and autoimmune toxicity
Source: JCI journal article supplement (doi:10.1172/jci121004), 2018-11-13
Supplement: sd1 [file 1]

301 Moved Permanently

# Moved Permanently

The document has moved here.
